# Supplementary material
Source: PubMed Central journal article supplement (PMC4788064)
Supplement: thas837922.ww1_default.pdf [file thas837922.ww1_default.pdf]

**Appendix 1 Clinical characteristics of the studies included in the systematic review of pregnancy outcomes in euthyroid women with thyroid auto-antibodies [posted as supplied by author]**

**a) Cohort studies**

| Study (Year)<br>Language    | Study                                                                                                                                                   |                                                                                   | Population                            |                                                                                                                                                                                                                                                             |                                                                                                                                                                                              |                                                                                                                                                                       | Test                                                                         |                                                                                                                                                |                      |                                                                                                                                                                         | Outcome                                |
|-----------------------------|---------------------------------------------------------------------------------------------------------------------------------------------------------|-----------------------------------------------------------------------------------|---------------------------------------|-------------------------------------------------------------------------------------------------------------------------------------------------------------------------------------------------------------------------------------------------------------|----------------------------------------------------------------------------------------------------------------------------------------------------------------------------------------------|-----------------------------------------------------------------------------------------------------------------------------------------------------------------------|------------------------------------------------------------------------------|------------------------------------------------------------------------------------------------------------------------------------------------|----------------------|-------------------------------------------------------------------------------------------------------------------------------------------------------------------------|----------------------------------------|
|                             | Quality                                                                                                                                                 | Number of patients                                                                | Prevalence of thyroid auto-antibodies | Inclusion criteria                                                                                                                                                                                                                                          | Exclusion criteria                                                                                                                                                                           | Any intervention                                                                                                                                                      | Description of test                                                          | Timing of testing                                                                                                                              | Frequency of testing | Cut off level                                                                                                                                                           |                                        |
| DeCarolis (2004)<br>English | Cohort<br>Prospective<br>Unreported patient enrolment<br>Not blind<br>Population described<br>Test described<br>Complete follow up                      | 203 non-pregnant women with primary antiphospholipid syndrome<br><br>162 controls | 18.9%                                 | 203 non-pregnant women with primary antiphospholipid syndrome (antiphospholipid antibodies and recurrent miscarriage)<br>Control group- 162 non-pregnant women with recurrent miscarriage and negative thyroid autoimmunity and antiphospholipid antibodies | Other possible causes of recurrent miscarriage (genetic, anatomic, hormonal, etc), autoimmune disease (except antiphospholipid positive)                                                     | High dose intravenous immunoglobulin (IVIg) (Flebogamma, Grifols, Pisa, Italy) once pregnancy is confirmed by a positive serum BHCG and gestational sac on ultrasound | Incomplete, Thyroid peroxidase (TPO) and Thyroglobulin (TG)-radioimmunoassay | Non pregnant-not specified the time of test in relation to last pregnancy                                                                      | Once                 | Positive TPO >80 IU/ml, Positive TG > 80 IU/ml                                                                                                                          | Miscarriage                            |
| Pratt (1993)<br>English     | Cohort<br>Prospective<br>Unreported patient enrolment<br>Not blind<br>Population described<br>Test described<br>Outcome described<br>Complete follow up | 42 non-pregnant women with recurrent miscarriage                                  | 31.0%                                 | Non-pregnant women with ≥ 3 consecutive pregnancy losses                                                                                                                                                                                                    | Women with other obvious causes for pregnancy loss-significant uterine anomalies, uterine myomas, parental chromosomal abnormalities, autoimmune abnormalities among phospholipid antibodies | Patients with possible luteal phase defect with progesterone                                                                                                          | Complete, TPO and TG- Kalibre Radio ImmunE Assay (RIA) kits                  | ≥ 6 months pre pregnancy and 4 to 6 weeks from last menstrual period as pregnancy is diagnosed from rising hCG (human chorionic gonadotrophin) | 2 times              | Cut off not stated, but range of levels given and absolute levels for antibody positive, associated normal TSH 0.35-7.0 microIU/ml, associated normal FT4 0.9-2.1 ng/dl | First trimester miscarriage            |
| Rushworth (2000)<br>English | Cohort<br>Prospective<br>Consecutive patient enrolment<br>Not blind<br>Test described<br>Outcome not described<br>Follow up not complete                | 870 with recurrent miscarriages<br>105 pregnancies                                | 22.9%                                 | Attending recurrent miscarriage clinic, 3 or more miscarriages                                                                                                                                                                                              | Couples with abnormal karyotype, thyroid dysfunction, maternal history of thyroid dysfunction-although treated                                                                               | None                                                                                                                                                                  | TPO- Serodia ATM, TG- Japanese Serodia ATG particle agglutination kits       | Pre pregnancy                                                                                                                                  | Once                 | TG 1 in 100, TPO 1 in 400, associated normal TSH 0.5-5.0 mIU/l                                                                                                          | First and second trimester miscarriage |
| Kim (1998)<br>English       | Cohort<br>Prospective                                                                                                                                   | 28 euthyroid infertile                                                            | 22.2%                                 | Tubal factor or unexplained                                                                                                                                                                                                                                 | Positive antinuclear                                                                                                                                                                         | None                                                                                                                                                                  | Inconclusive, TPO and TG-                                                    | 6 months pre pregnancy                                                                                                                         | Once                 | Positive TPO>100 U/ml,                                                                                                                                                  | Miscarriage                            |

|                          |                                                                                                                                |                                                                                                                                                                                               |       |                                                                                                                                                                         |                                                                          |                                                                                                               |                               |                                                                                                                                                    |           |                                                                                                                     |                                                                                                     |
|--------------------------|--------------------------------------------------------------------------------------------------------------------------------|-----------------------------------------------------------------------------------------------------------------------------------------------------------------------------------------------|-------|-------------------------------------------------------------------------------------------------------------------------------------------------------------------------|--------------------------------------------------------------------------|---------------------------------------------------------------------------------------------------------------|-------------------------------|----------------------------------------------------------------------------------------------------------------------------------------------------|-----------|---------------------------------------------------------------------------------------------------------------------|-----------------------------------------------------------------------------------------------------|
|                          | Unreported patient enrolment<br>Not blind<br>Complete follow up                                                                | women with antithyroid antibodies (cases) and 51 controls                                                                                                                                     |       | infertility<br>Control group- euthyroid women without antithyroid antibodies who underwent in vitro fertilisation (IVF) & embryo transfer (ET) (IVF-ET Embryo transfer) | antibody, lupus coagulant, anticardiolipin antibody or rheumatoid factor |                                                                                                               | radioligand assay             |                                                                                                                                                    |           | Positive TG >100 U/ml                                                                                               |                                                                                                     |
| Muller (1999)<br>English | Cohort<br>Prospective<br>Arbitrary patient enrolment<br>Not blind<br>Test described<br>Outcome described<br>Complete follow up | 173 final patients consented (54 became pregnant)                                                                                                                                             | 22.2% | Attending IVF (Invitro fertiliSation) program                                                                                                                           | No consent, unable to determine if TPO antibodies were present           | None                                                                                                          | TPO- RIA (Radio immune assay) | Pre pregnancy, after miscarriage or within first trimester pregnancy if ongoing pregnancy                                                          | 1-2 times | Positive TPO > 80 U/ml, associated normal TSH 0.2-4.5 microIU/ml                                                    | Miscarriage                                                                                         |
| Negro (2005)<br>English  | Cohort<br>Prospective<br>Unreported patient enrolment<br>Blinding<br>Test described<br>Complete follow up                      | 484 infertile women undergoing assisted reproductive technology (ART)- 72 TPO positive (of which 36 in Group A (treatment) and 36 in Group B (placebo) The other 412 in Group C- TPO negative | 6.2%  | Infertile women undergoing a first assisted reproduction technology, all patients underwent ovarian induction                                                           | Overt thyroid dysfunction                                                | 36 TPO patients (Group A) underwent levothyroxine (LT4) treatment 1 month before ART and throughout pregnancy | TPO- radioimmunoassay kit     | Pre pregnancy (before undergoing ART), Thyroid Function Tests (TFTs) checked on Group A patients 1 month after LT4 started and before starting ART | Once      | Positive TPO >100 kIU/l, associated normal TSH 0.27-4.2 mIU/l, associated normal fT4 9.3-18.0 ng/l (12-33.5 pmol/l) | Miscarriage rates (included early pregnancy loss- biochemical)<br>Pregnancy rates<br>Delivery rates |
| Negro (2006)<br>English  | Cohort<br>Retrospective<br>Unreported patient enrolment<br>Not blind<br>Test described                                         | 255 infertile women who underwent assisted reproductive technology                                                                                                                            | 6.3%  | Infertile women undergoing first ART procedure during study period                                                                                                      | Women > 35 years of age, overt thyroid dysfunction                       | None                                                                                                          | TPO- RIA kit                  | TPO and TFTs checked before ART, then TFTs at 12 and 30 weeks gestation                                                                            | Once      | Positive TPO >100 kU/l, associated normal TSH 0.27-4.2 mU/l, associated normal fT4 9.3-18.0 ng/l (12-33.5 pmol/l)   | Delivery rate<br>Pregnancy<br>Miscarriage                                                           |
| Poppe (2003)<br>English  | Cohort<br>Prospective<br>Unreported patient enrolment<br>Not blind<br>Complete follow up                                       | 234 infertile female patients                                                                                                                                                                 | 16.3% | Attending Center for Reproductive Medicine before a first ART cycle, all patients received controlled ovarian superovulation                                            | Overt thyroid dysfunction                                                | None                                                                                                          | TPO- RIA kit                  | Pre pregnancy & pre ART                                                                                                                            | Once      | Positive TPO >100 kU/l, normal TSH 0.27-4.2 mU/l, normal fT4 9.3-18.0 ng/l (12-33.5 pmol/l)                         | Miscarriage                                                                                         |

|                            |                                                                                                                                                                  |                                                   |       |                                                                                                                                       |                                                                                    |      |                                                                                   |                                                                                                                                                    |         |                                                                                                                                                                     |                                                                   |
|----------------------------|------------------------------------------------------------------------------------------------------------------------------------------------------------------|---------------------------------------------------|-------|---------------------------------------------------------------------------------------------------------------------------------------|------------------------------------------------------------------------------------|------|-----------------------------------------------------------------------------------|----------------------------------------------------------------------------------------------------------------------------------------------------|---------|---------------------------------------------------------------------------------------------------------------------------------------------------------------------|-------------------------------------------------------------------|
| Poppe (2004)<br>English    | Cohort<br>Prospective<br>Unreported patient enrolment<br>Not blind<br>Population described<br>Test described<br>Outcome described<br>Complete follow up          | 35 infertile, post-ovarian hyperstimulation women | 25.7% | Infertile, euthyroid women with an ongoing pregnancy after having ovarian hyperstimulation                                            | Not mentioned                                                                      | None | Complete, TPO-RIA kit (B.R.A.H.M.S. Diagnostica, Berlin)                          | >20 days before a first assisted reproductive technology (ART), then TFTs monitored every 20 days after ovulation induction during first trimester | Once    | Positive TPO >100 kU/l, associated normal TSH 0.27-4.2 mU/L, associated normal fT4 9.3-18.0 ng/liter (12-23.2 pmol/l)                                               | First trimester miscarriage                                       |
| Singh (1995)<br>English    | Cohort<br>Retrospective<br>Unreported patient enrolment<br>Not blind<br>Test described<br>Complete follow up                                                     | 487 infertile patients who conceived with ART     | 21.8% | Successfully conceived with assisted reproductive techniques (ART)                                                                    | None                                                                               | None | Inconclusive, TPO & TG- enzyme immunoassay                                        | Stored serum- 14 day post embryo transfer (hCG >5)                                                                                                 | Once    | Index ratio compared to patient- reflects ratio of patient specimen absorbance to the absorbance of a positive reference, positive sample antibody index $\geq 3.8$ | Miscarriage (clinical, biochemical, ectopic pregnancy), delivered |
| Bagis (2001)<br>English    | Cohort<br>Retrospective<br>Unreported patient enrolment<br>Not blind<br>Test described                                                                           | 902 women consented, 876 completed the study      | 12.3% | First visit to the antenatal clinics, no history of thyroid disorder, women who had been seen at least twice in the postpartum period | Without consent, abnormal thyroid function                                         | None | TPO & TG-IMMULITE autoanalyser using a chemiluminescent enzyme immunometric assay | 12 weeks, between 32 to 36 weeks, and then every 2 months postpartum until 1 year after delivery                                                   | 8 times | Positive TPO >35 IU/ml, positive TG >40 IU/ml, associated normal TSH 0.3-4.0 microU/ml, associated normal fT4 9-25 pmol/ml                                          | Recurrent miscarriage<br>1 year post partum follow up             |
| Ghafoor (2006)<br>English  | Cross-sectional<br>Prospective<br>Unreported patient enrolment<br>Not blind<br>Population described<br>Test described<br>Outcome described<br>Complete follow up | 1500 euthyroid pregnant women                     | 11.2% | All euthyroid pregnant women registered at antenatal clinic, aged 18-40                                                               | Not mentioned                                                                      | None | TPO – ELISA, inhouse assay reagents<br>FT4 & TSH-ELISA kits                       | Not mentioned                                                                                                                                      | Once    | Positive TPO > 100 U/ml                                                                                                                                             | Miscarriage<br>Preterm livery                                     |
| Glincoer (1991)<br>English | Cohort<br>Prospective<br>Not blind<br>Population described<br>Test described                                                                                     | 726 pregnant women                                | 6.9%  | Euthyroid, pregnant women                                                                                                             | Overt thyroid dysfunction<br>thyroid autoimmunity, goiter, nodules or past thyroid | None | TG- solid phase RIA<br>TPO- DYNO-test anti-TPO kit                                | <20 weeks in more than 70% of pregnancies, at 32 weeks gestation, 3 days after                                                                     | 3 times | Positive TG >30 microg/L, Positive TPO >100 U/ml                                                                                                                    | Miscarriage                                                       |

|                                  | Complete follow up                                                                                                                                      |                                                                                                       |       | disorder                                                                                                                                |                                                                                                  |      |                                                                                              | delivery                                               |                                                     |                                                                                                     |                                                                                                                    |
|----------------------------------|---------------------------------------------------------------------------------------------------------------------------------------------------------|-------------------------------------------------------------------------------------------------------|-------|-----------------------------------------------------------------------------------------------------------------------------------------|--------------------------------------------------------------------------------------------------|------|----------------------------------------------------------------------------------------------|--------------------------------------------------------|-----------------------------------------------------|-----------------------------------------------------------------------------------------------------|--------------------------------------------------------------------------------------------------------------------|
| Glinoe (1994)<br>English         | Cohort<br>Prospective<br>Consecutive patient enrolment<br>Not blind<br>Test described<br>Complete follow up                                             | 87 euthyroid women & positive thyroid antibodies (cases)<br>Control group- 606 healthy pregnant women | 12.6% | Consecutive euthyroid pregnant women attending prenatal clinic without previous history of thyroid disease, positive thyroid antibodies | Women with positive thyroid antibodies and abnormal thyroid function (hypo- and hyperthyroidism) | None | Complete, TPO-DYNO-test anti-TPO kit<br>TG- RIA developed following the method of Delespesse | Each trimester and 3-4 days post delivery (sequential) | Sequential during gestation to parturition- 4 times | Positive TPO >150 U/ml, positive TG > 50 U/ml, associated normal TSH 0.2-4.0 mU/l                   | Miscarriage<br>Preterm delivery<br>Neonatal weight, height, cranial perimeter, Apgar score                         |
| Iijima (1997)<br>English         | Cohort<br>Prospective<br>Unreported patient enrolment<br>Not blind<br>Population described<br>Test described<br>Outcome described<br>Complete follow up | 1179 pregnant women                                                                                   | 11.6% | Healthy pregnant women                                                                                                                  | Multifetal gestations, antiphospholipid autoantibodies or lupus anticoagulant                    | None | TPO & TG hemagglutination or particle aggregation kits                                       | 6 to 14 weeks gestation                                | Once                                                | Positive TPO $\geq$ 1 in 100, Positive TG $\geq$ 1 in 100                                           | Miscarriage<br>Preterm delivery<br>Pregnancy-induced hypertension<br>Stillbirth<br>Birth weight<br>Any information |
| Lejeune (1993)<br>English        | Cohort<br>Prospective<br>Arbitrary patient enrolment                                                                                                    | 730 consecutive pregnant women                                                                        | 6.3%  | Attending antenatal clinic- euthyroid pregnant women                                                                                    | Women not assessed < 14 weeks gestation                                                          | None | TG- solid phase RIA, TPO-DYNO-test anti-TPO kit                                              | First trimester pregnancy                              | Not specified                                       | Positive TG >100 U/ml, Positive TPO >150 U/ml                                                       | First and second trimester miscarriage<br>Pregnancy induced pertension                                             |
| Sieiro Netto (2004)<br>English   | Cohort<br>Prospective<br>Unreported patient enrolment<br>Not blind<br>Test described<br>Complete follow up                                              | 534 pregnant women                                                                                    | 5.4%  | Attended antenatal clinic- euthyroid, pregnant women                                                                                    | Overt thyroid dysfunction                                                                        | None | Complete, TPO-ICMA method                                                                    | During pregnancy                                       | Once                                                | Positive TPO >40 U/ml, associated normal TSH 0.4-3.8 mU/l, associated normal FT4 0.8-2.0 ng/dl      | Miscarriage < weeks<br>Live birth                                                                                  |
| Stagnaro-Green (1990)<br>English | Cohort<br>Prospective<br>Consecutive patient enrolment<br>Not blind<br>Population described<br>Test described                                           | 552 pregnant women                                                                                    | 20.3% | First trimester pregnant women < 13 weeks                                                                                               | None                                                                                             | None | Complete, TPO and TG- specific sensitive ELISAs                                              | 6 to 13 weeks during pregnancy                         | Once                                                | ELISA index reference, normal range for thyroid autoantibody ELISAs < 0.20, normal T4 58-161 nmol/l | First and second trimester miscarriage                                                                             |
| Sezer (2009)<br>English          | Cohort<br>Prospective                                                                                                                                   | Euthyroid<br>128 pregnant                                                                             | 21.9% | All euthyroid women (aged 18-39) had a                                                                                                  | Women with habitual                                                                              | None | Serum TSH, free T <sub>4</sub> , TPO and TG-                                                 | Once during first trimester of                         | Twice                                               | Positive TPO >34 IU/ml,                                                                             | Miscarriage, e births                                                                                              |

|                          |                                                                                                                                                                     |                                                                  |       |                                                                                                                                                                                                                                                                                                                                      |                                                                                                                                        |      |                                                         |                                                       |       |                                                                                            |                                                                                                               |
|--------------------------|---------------------------------------------------------------------------------------------------------------------------------------------------------------------|------------------------------------------------------------------|-------|--------------------------------------------------------------------------------------------------------------------------------------------------------------------------------------------------------------------------------------------------------------------------------------------------------------------------------------|----------------------------------------------------------------------------------------------------------------------------------------|------|---------------------------------------------------------|-------------------------------------------------------|-------|--------------------------------------------------------------------------------------------|---------------------------------------------------------------------------------------------------------------|
|                          | Population described<br>Not blind<br>Test described<br>Outcome described<br>Complete follow up                                                                      | women                                                            |       | history of maximum one abortus without any previous endocrinological, immunological disorders.                                                                                                                                                                                                                                       | miscarriage, miscarriage with known causes (anatomical defects, genetic abnormalities, autoimmune disorders) or in vitro fertilisation |      | Roche E170                                              | gestation and 1 month after live birth or miscarriage |       | Positive TG > 115 IU/ml, normal TSH 0.3-4.5 mIU/l, normal free T <sub>4</sub> 10-22 pmol/l |                                                                                                               |
| Haddow (2010)<br>English | Cross-sectional<br>Prospective<br>Unreported patient<br>enrolment<br>Not blind<br>Population described<br>Test described<br>Outcome described<br>Complete follow up | 9670<br>euthyroid pregnant women, 392 hypothyroid pregnant women | 14.6% | All euthyroid pregnant women registered at antenatal clinic, with viable single pregnancy. Thyroid related measurements were available in the first and second trimester and gestational age was established by ultrasonography. Included cohort was participants in the FaSTER First and Second Trimester Risk of Aneuploidy study. | Women with unknown hypothyroid status                                                                                                  | None | TPO and TG measured using the Immulite 2000 methodology | Tests in first and second trimester                   | Twice | Positive TPO >35IU/ml<br>Positive TG >40IU/ml                                              | Preterm delivery <37 weeks and 32 weeks<br>Birth weight < 2.5 kg<br>Preterm<br>Premature Rupture Of Membranes |

## b) Case-control studies

| Study (Year)<br>Language  | Study                                                                                                                                                 |                                                                                                                                           |                                                                                                                                                                                                                                                                                                                   | Population         |                  |                                                                          | Test                     |                      |                                                   | Outcome               |
|---------------------------|-------------------------------------------------------------------------------------------------------------------------------------------------------|-------------------------------------------------------------------------------------------------------------------------------------------|-------------------------------------------------------------------------------------------------------------------------------------------------------------------------------------------------------------------------------------------------------------------------------------------------------------------|--------------------|------------------|--------------------------------------------------------------------------|--------------------------|----------------------|---------------------------------------------------|-----------------------|
|                           | Quality                                                                                                                                               | Number of patients                                                                                                                        | Inclusion criteria                                                                                                                                                                                                                                                                                                | Exclusion criteria | Any intervention | Description of test                                                      | Timing of testing        | Frequency of testing | Cut off level                                     |                       |
| Bellver (2008)<br>English | Case-control<br>Retrospective<br>Unreported patient<br>enrolment<br>Population described<br>Test described<br>Outcome described<br>Complete follow up | 31 women with unexplained infertility, 26 women with implantation failure, 30 women with recurrent miscarriage (cases)<br><br>32 controls | Cases- less than 38 years of age, normal karyotype, normal ovarian function, normal uterus, no endocrine or autoimmune disorders, at least 2 clinical miscarriages<br>Control group- 32 oocyte donors of 18-35 years of age, all Caucasian, with normal karyotype, no history of spontaneous abortion, autoimmune | Not mentioned      | None             | Complete, TPO & TG- 2-site immunoluminometric assay (sandwich principle) | >3 months post pregnancy | Once                 | Positive TPO >25 UI/ml,<br>Positive TG >100 UI/ml | Recurrent miscarriage |

|                              |                                                                                                                                                                 |                                                                                                                |                                                                                                                                                                                                                                                   |                                                                                               |                                                                       |                                                                |                          |      |                                                                                  |                       |
|------------------------------|-----------------------------------------------------------------------------------------------------------------------------------------------------------------|----------------------------------------------------------------------------------------------------------------|---------------------------------------------------------------------------------------------------------------------------------------------------------------------------------------------------------------------------------------------------|-----------------------------------------------------------------------------------------------|-----------------------------------------------------------------------|----------------------------------------------------------------|--------------------------|------|----------------------------------------------------------------------------------|-----------------------|
|                              |                                                                                                                                                                 |                                                                                                                | disorders or endocrine diseases, and previous term pregnancies without complications.                                                                                                                                                             |                                                                                               |                                                                       |                                                                |                          |      |                                                                                  |                       |
| Bussen (1995)<br>English     | Case-control<br>Retrospective<br>Unreported patient enrolment<br>Not blind<br>Population described<br>Test described<br>Outcome described<br>Complete follow up | 22 euthyroid, non pregnant women with recurrent miscarriage (cases), 44 controls without endocrine dysfunction | 22 non-pregnant women with $\geq 3$ consecutive pregnancy losses (only 2 women had 1 live birth before consecutive losses)<br>Control group- random selection of women between 2 and 6 term pregnancies and had no history of previous abortions. | Significant uterine abnormalities or parental chromosomal abnormalities                       | None                                                                  | Complete, TPO & TG- ELISA kits;                                | >6 months post pregnancy | Once | TPO >100 IU/ml, TG >100 IU/ml                                                    | Miscarriage           |
| Bussen (1997)<br>English     | Case-control<br>Retrospective<br>Not blind<br>Population described<br>Test described<br>Outcome described<br>Complete follow up                                 | 28 Recurrent miscarriage (cases)<br>28 controls                                                                | Euthyroid non-pregnant habitual aborters (only 2 of 28 women had a live birth before their consecutive losses)<br>Control group- multigravidae without previous abortions or endocrine dysfunctions                                               | Systemic lupus erythematoses, uterine abnormalities, abnormal chromosome, autoimmune diseases | None                                                                  | TPO & TG- ELISA kits                                           | >6 months post pregnancy | Once | Positive TPO >100 IU/ml, Positive TG >100 IU/ml                                  | Recurrent miscarriage |
| Dendrinios (2000)<br>English | Case-control<br>Retrospective<br>Unreported patient enrolment<br>Not blind<br>Complete follow up                                                                | 30 women with recurrent miscarriages (cases) and 15 controls                                                   | 3 or more consecutive pregnancy losses<br>Control group- fertile women with 1 to 2 live births                                                                                                                                                    | Known causes of recurrent miscarriages-                                                       | None                                                                  | Inconclusive, TPO & TG- chemiluminescence sandwich immunoassay | >6 months post pregnancy | Once | Positive range for this assay >2 IU/ml, associated normal TSH 0.5-4.6 microIU/ml | Recurrent miscarriage |
| Esplin (1998)<br>English     | Case-control<br>Retrospective<br>Arbitrary patient enrolment<br>Blinding<br>Test described                                                                      | 74 non-pregnant women with recurrent miscarriage (cases) and 75 healthy controls                               | $\geq 3$ consecutive pregnancy losses with $\leq 1$ previous live birth, negative lupus anticoagulant and < 20 IgG phospholipid binding units of anticardiolipin antibodies                                                                       | Identifiable cause of pregnancy losses, pregnant within 6 months before included into study   | Daily progesterone vaginal suppository if luteal-phase defect present | Complete, IgG TPO and IgG TG- radioimmunoassay kits            | >6 months post pregnancy | Once | Not stated, associated normal TSH 0.2-5.0 microU/ml                              | Recurrent miscarriage |
| Iravani (2008)<br>English    | Case-control<br>Retrospective<br>Consecutive or arbitrary patient enrolment<br>Not blind                                                                        | 641 patients with recurrent miscarriages (cases) and 296 controls                                              | Recurrent miscarriage before 20 weeks and previous $\geq 3$ consecutive miscarriages<br>Control group-                                                                                                                                            | Abnormal thyroid function tests, positive antiphospholipid antibodies,                        | None                                                                  | Complete, TPO- ELISA<br>TG- ELISA method                       | >6 months post pregnancy | Once | TG >125 IU/ml, TPO > 40 IU/ml, normal TSH 0.4-4 mIU/L, normal T4 4.5-            | Recurrent miscarriage |

|                           |                                                                                                                                                                    |                                                                                                                                                 |                                                                                                                                                                                                                                                                                                                                                                                                                                                     |                                                                                                                                                               |      |                                                     |                                                                                    |      |                                                                                                                        |                                                       |
|---------------------------|--------------------------------------------------------------------------------------------------------------------------------------------------------------------|-------------------------------------------------------------------------------------------------------------------------------------------------|-----------------------------------------------------------------------------------------------------------------------------------------------------------------------------------------------------------------------------------------------------------------------------------------------------------------------------------------------------------------------------------------------------------------------------------------------------|---------------------------------------------------------------------------------------------------------------------------------------------------------------|------|-----------------------------------------------------|------------------------------------------------------------------------------------|------|------------------------------------------------------------------------------------------------------------------------|-------------------------------------------------------|
|                           | Population described<br>Test described<br>Outcome described<br>Complete follow up                                                                                  |                                                                                                                                                 | randomly recruited from women who had delivered during the study period                                                                                                                                                                                                                                                                                                                                                                             | positive cervical culture, anatomic abnormalities, abnormal karyotype, abnormal hormonal profile and known or treated thyroid disease                         |      |                                                     |                                                                                    |      | 10.9 microg/dL, normal T3 60-181 ng/dL                                                                                 |                                                       |
| Kutteh (1999)<br>English  | Case-control<br>Retrospective<br>Unreported patient<br>enrolment<br>Not blind<br>Population described<br>Test described<br>Outcome described<br>Complete follow up | 688 infertile women undergoing ART (Assisted reproductive techniques), 700 women with recurrent miscarriage (cases), Control- 200 healthy women | Women undergoing assisted reproductive Women with at least 2 consecutive pregnancy losses (cases).<br>Control group- healthy, non-pregnant, reproductive-aged, parous women without reproductive problems                                                                                                                                                                                                                                           | Those undergoing ART with more than one pregnancy loss or known thyroid disease<br>Those with $\geq 2$ consecutive pregnancy losses and known thyroid disease | None | TPO and TG-ELISA tests kits                         | At least 3 months after pregnancy or miscarriage before ART cycles (pre pregnancy) | Once | Positive TPO $\geq 65$ IU/ml<br>Positive TG $\geq 120$ IU/ml                                                           | Recurrent miscarriage                                 |
| Mecacci (2000)<br>English | Case-control<br>Retrospective<br>Unreported patient<br>enrolment<br>Not blind<br>Population described<br>Test described<br>Outcome described<br>Complete follow up | 360 initially for Preconception counseling (PCC)- 69 cases and 69 control                                                                       | Referrals for Pre conception counseling (history of recurrent miscarriage, fetal death or preeclampsia), 2 or more spontaneous miscarriage $\leq 12$ weeks, $\geq 1$ unexplained fetal death more than 12 weeks, BP more than 140/90 mmHg on 2 occasions 6 hours apart and proteinuria $> 0.3$ g/l/24 hour in previous gestations)<br>Control group- no history of thyroid disorders or obstetric complications, age, gravidity and parity matched. | None                                                                                                                                                          | None | Inconclusive; TPO-RIA kits<br>TG- RIA kits          | $>6$ months post pregnancy                                                         | Once | TG $>50$ iu/ml,<br>TPO $>10$ iu/ml, associated TSH, associated normal free T3 2.6-5.6 pg/ml and free T4 7.8-18.4 pg/ml | Recurrent miscarriage<br>Pre-eclampsia<br>Fetal death |
| Pratt (1993)<br>English   | Case-control<br>Retrospective<br>Unreported patient<br>enrolment<br>Not blind                                                                                      | 45 women with recurrent miscarriage (cases)<br>100 controls                                                                                     | Women with recurrent miscarriage (3 or more consecutive first- or second- trimester losses)                                                                                                                                                                                                                                                                                                                                                         | Not mentioned                                                                                                                                                 | None | Complete, TPO and TG- Kalibre radioimmunoassay kits | Non pregnant- not specified the time of test in relation to last                   | Once | Positive TPO $\geq 0.3$ U/ml,<br>Positive TG $\geq 0.3$ U/ml, associated normal TSH                                    | Recurrent miscarriage                                 |

|                                |                                                                                              |                                                                                                                                                                                     |                                                                                                                                                                                                                                                                                                                          |                                                   |      |                                                                               |                                                                                              |      |                                                                      |                          |
|--------------------------------|----------------------------------------------------------------------------------------------|-------------------------------------------------------------------------------------------------------------------------------------------------------------------------------------|--------------------------------------------------------------------------------------------------------------------------------------------------------------------------------------------------------------------------------------------------------------------------------------------------------------------------|---------------------------------------------------|------|-------------------------------------------------------------------------------|----------------------------------------------------------------------------------------------|------|----------------------------------------------------------------------|--------------------------|
|                                | Population described<br>Test described<br>Complete follow up                                 |                                                                                                                                                                                     | Control group-<br>normal blood donors,<br>aged 18-68 years                                                                                                                                                                                                                                                               |                                                   |      |                                                                               | pregnancy                                                                                    |      | 0.35-7.0<br>microIU/ml,<br>associated<br>normal fT4<br>0.9-2.1 ng/dl |                          |
| Shoenfeld<br>(2006)<br>English | Case-control<br>Retrospective<br>Unreported<br>patient<br>enrolment<br>Complete<br>follow up | 269 non<br>pregnant clinic<br>(cases) – 109<br>recurrent<br>pregnancy loss,<br>69 infertility, 3<br>infections, 5<br>ectopics, 63<br>unclassified<br>pregnancy loss<br>120 controls | Cases- recurrent<br>pregnancy loss<br>(RPL), unclassified<br>pregnancy loss,<br>infertility, previous<br>ectopic pregnancy,<br>infections,<br>autoimmune<br>diseases. Patient<br>attending<br>gynaecology,<br>immunology or<br>obstetrics clinics<br>Control group-<br>healthy volunteers<br>age-matched to the<br>cases | Women being<br>pregnant at the<br>time of testing | None | Inconclusive, TG<br>and TPO- enzyme-<br>linked<br>immunosorbent<br>assay kits | Non<br>pregnant- not<br>specified the<br>time of test<br>in relation to<br>last<br>pregnancy | Once | Not stated                                                           | Recurrent<br>miscarriage |
